# Supplementary material for: Active nematic–isotropic interfaces in channels
Source: Royal Society of Chemistry journal article supplement (doi:10.1039/c9sm00859d), 2019-01-01
Supplement: c9sm00859d1.pdf [file c9sm00859d1.pdf]

# Electronic Supplementary Information: Active nematic-isotropic interfaces in channels

Rodrigo C. V. Coelho,<sup>\*a,b</sup> Nuno A. M. Araújo,<sup>a,b</sup> and Margarida M. Telo da Gama<sup>a,b</sup>

We describe the details of the multi-relaxation-time lattice Boltzmann method used in the simulations and the parameters of the systems illustrated in the videos in the ESI.

## 1 Description of the videos

The three videos illustrate the results of simulations running up to  $t = 500000$  with interval between the frames of  $\Delta t = 5000$ . The parameters and initial conditions are described in Sec. 3.1 of the paper.

**video1.gif.** Interfacial dancing state for homeotropic anchoring (fig. 3C of the paper). Here  $\zeta = 0.002$ ,  $\xi = 0.7$ .

**video2.gif.** Interfacial dancing state for planar anchoring (fig. 12C of the paper). Here  $\zeta = 0.0025$ ,  $\xi = 0.5$ .

**video3.gif.** Interfacial instability at a closed channel with nematic left boundary and isotropic right boundary (fig. 13 D-G). No slip boundary conditions are applied at the four walls. Here  $\zeta = -0.002$ ,  $\xi = 0.5$ .

## 2 The MRT collision operator

As described in the paper, the lattice-Boltzmann equation with the MRT collision operator reads as follows:

$$f_i(\mathbf{x} + \mathbf{c}_i \Delta t, t + \Delta t) - f_i(\mathbf{x}, t) = \mathbf{M}^{-1} \mathbf{R} \mathbf{M} [f_i(\mathbf{x}, t) - f_i^{eq}(\mathbf{x}, t)] \Delta t + \mathcal{S}_i, \quad (1)$$

where the transformation matrix  $\mathbf{M}$  transforms the populations space into the moments space, the relaxation matrix  $\mathbf{R}$  includes the relaxation rates of the individual moments and  $\mathcal{S}_i$  is the source term. In the simplest form (first order accurate), the source term is  $\mathcal{S}_i = 3w_i \mathbf{F} \cdot \mathbf{c}_i$ . In our simulations, we projected the Guo's forcing term in the moments space using the matrix  $\mathbf{M}$ , similarly as done for the populations. This procedure is described in Chapter 10 of Ref.<sup>1</sup>. For an implementation of the MRT in the D3Q19 lattice in C++, we recommend Palabos<sup>2</sup>. The matrices and vectors are given below.

The velocity vectors for the D3Q19 are given by:

$$c_x = [0, -1, 0, 0, -1, -1, -1, -1, 0, 0, 1, 0, 0, 1, 1, 1, 1, 0, 0]$$

$$c_y = [0, 0, -1, 0, -1, 1, 0, 0, -1, -1, 0, 1, 0, 1, -1, 0, 0, 1, 1]$$

$$c_z = [0, 0, 0, -1, 0, 0, -1, 1, -1, 1, 0, 0, 1, 0, 0, 1, -1, 1, -1].$$

The discrete weight associated with each vector depends on its length:  $w(0) = 1/3$ ,  $w(1) = 1/18$  and  $w(2) = 1/36$ . The transformation

<sup>a</sup> Centro de Física Teórica e Computacional, Faculdade de Ciências, Universidade de Lisboa, P-1749-016 Lisboa, Portugal; E-mail: rvc Coelho@fc.ul.pt

<sup>b</sup> Departamento de Física, Faculdade de Ciências, Universidade de Lisboa, P-1749-016 Lisboa, Portugal.

matrix is:

$$\mathbf{M} = \begin{bmatrix} 1 & 1 & 1 & 1 & 1 & 1 & 1 & 1 & 1 & 1 & 1 & 1 & 1 & 1 & 1 & 1 & 1 & 1 \\ -30 & -11 & -11 & -11 & 8 & 8 & 8 & 8 & 8 & 8 & -11 & -11 & -11 & 8 & 8 & 8 & 8 & 8 \\ 12 & -4 & -4 & -4 & 1 & 1 & 1 & 1 & 1 & 1 & -4 & -4 & -4 & 1 & 1 & 1 & 1 & 1 \\ 0 & -1 & 0 & 0 & -1 & -1 & -1 & -1 & 0 & 0 & 1 & 0 & 0 & 1 & 1 & 1 & 1 & 0 \\ 0 & 4 & 0 & 0 & -1 & -1 & -1 & -1 & 0 & 0 & -4 & 0 & 0 & 1 & 1 & 1 & 1 & 0 \\ 0 & 0 & -1 & 0 & -1 & 1 & 0 & 0 & -1 & -1 & 0 & 1 & 0 & 1 & -1 & 0 & 0 & 1 \\ 0 & 0 & 4 & 0 & -1 & 1 & 0 & 0 & -1 & -1 & 0 & -4 & 0 & 1 & -1 & 0 & 0 & 1 \\ 0 & 0 & 0 & -1 & 0 & 0 & -1 & 1 & -1 & 1 & 0 & 0 & 1 & 0 & 0 & 1 & -1 & 1 \\ 0 & 0 & 0 & 4 & 0 & 0 & -1 & 1 & -1 & 1 & 0 & 0 & -4 & 0 & 0 & 1 & -1 & 1 \\ 0 & 2 & -1 & -1 & 1 & 1 & 1 & 1 & -2 & -2 & 2 & -1 & -1 & 1 & 1 & 1 & 1 & -2 \\ 0 & -4 & 2 & 2 & 1 & 1 & 1 & 1 & -2 & -2 & -4 & 2 & 2 & 1 & 1 & 1 & 1 & -2 \\ 0 & 0 & 1 & -1 & 1 & 1 & -1 & -1 & 0 & 0 & 0 & 1 & -1 & 1 & 1 & -1 & -1 & 0 \\ 0 & 0 & -2 & 2 & 1 & 1 & -1 & -1 & 0 & 0 & 0 & -2 & 2 & 1 & 1 & -1 & -1 & 0 \\ 0 & 0 & 0 & 0 & 1 & -1 & 0 & 0 & 0 & 0 & 0 & 0 & 0 & 1 & -1 & 0 & 0 & 0 \\ 0 & 0 & 0 & 0 & 0 & 0 & 0 & 0 & 1 & -1 & 0 & 0 & 0 & 0 & 0 & 0 & 0 & 1 \\ 0 & 0 & 0 & 0 & 0 & 0 & 1 & -1 & 0 & 0 & 0 & 0 & 0 & 0 & 0 & 1 & -1 & 0 \\ 0 & 0 & 0 & 0 & -1 & -1 & 1 & 1 & 0 & 0 & 0 & 0 & 0 & 1 & 1 & -1 & -1 & 0 \\ 0 & 0 & 0 & 0 & 1 & -1 & 0 & 0 & -1 & -1 & 0 & 0 & 0 & -1 & 1 & 0 & 0 & 1 \\ 0 & 0 & 0 & 0 & 0 & 0 & -1 & 1 & 1 & -1 & 0 & 0 & 0 & 0 & 0 & 1 & -1 & -1 \end{bmatrix} \quad (2)$$

The equilibrium moments are:

$$\mathbf{m}^{\text{eq}} = \begin{bmatrix} \rho \\ \rho(-11 + 19u_x^2 + 19u_y^2 + 19u_z^2) \\ -\frac{1}{2}\rho(-6 + 11u_x^2 + 11u_y^2 + 11u_z^2) \\ \rho u_x \\ -\frac{2}{3}\rho u_x \\ \rho u_y \\ -\frac{2}{3}\rho u_y \\ \rho u_z \\ -\frac{2}{3}\rho u_z \\ \rho(2u_x^2 - u_y^2 - u_z^2) \\ \frac{1}{2}\rho(-2u_x^2 + u_y^2 + u_z^2) \\ \rho(u_y^2 - u_z^2) \\ \frac{1}{2}\rho(-u_y^2 + u_z^2) \\ \rho u_x u_y \\ \rho u_y u_z \\ \rho u_x u_z \\ 0 \\ 0 \\ 0 \end{bmatrix} \quad (3)$$

And the force term in the moment space is  $\mathbf{MF}' = (\mathbf{I} - \mathbf{R}/2)\mathbf{S}$ , where:

$$\mathbf{S} = \begin{bmatrix} 0 \\ 38(F_x u_x + F_y u_y + F_z u_z) \\ -11(F_x u_x + F_y u_y + F_z u_z) \\ F_x \\ -\frac{2}{3}F_x \\ F_y \\ -\frac{2}{3}F_y \\ F_z \\ -\frac{2}{3}F_z \\ 2(2F_x u_x - F_y u_y - F_z u_z) \\ (-2F_x u_x + F_y u_y + F_z u_z) \\ 2(F_y u_y - F_z u_z) \\ -F_y u_y + F_z u_z \\ F_y u_x + F_x u_y \\ F_z u_y + F_y u_z \\ F_z u_x + F_x u_z \\ 0 \\ 0 \\ 0 \end{bmatrix} \quad (4)$$

We use the relaxation rates of Ref.<sup>3</sup>, which have been shown to reduce significantly the spurious velocities in a multiphase pseudopotential model for simple fluids.

$$\mathbf{R} = \text{diag}(\omega_0, \omega_1, \dots, \omega_{18}) \quad (5)$$

where:  $\omega_0 = \omega_3 = \omega_5 = \omega_7 = \omega_{10} = \omega_{12} = \omega_{16} = \omega_{17} = \omega_{18} = 1$  and  $\omega_1 = \omega_2 = \omega_4 = \omega_6 = \omega_8 = 1.1$ . The parameters  $\omega_9 = \omega_{13} = \omega_{14} = \omega_{15}$  are related to the kinematic viscosity:  $\nu = c_s^2 \left( \frac{1}{\omega_9} - \frac{1}{2} \right)$ , while the  $\omega_1$  is related to the bulk viscosity:  $\eta_B = \rho c_s^2 \left( \frac{1}{\omega_1} - \frac{1}{2} \right) - \frac{\nu \rho}{3}$ .

## Notes and references

- 1 T. Krüger, H. Kusumaatmaja, A. Kuzmin, O. Shardt, G. Silva and E. M. Viggen, *The Lattice Boltzmann Method - Principles and Practice*, Springer International Publishing, 2016.
- 2 *Palabos*, <http://www.palabos.org>.
- 3 S. Ammar, G. Pernaumat and J.-Y. Trépanier, *Journal of Computational Physics*, 2017, **343**, 73 – 91.
